# Supplementary material
Source: publisher site journal article supplement (https://www.spandidos-publications.com/4308/downloadSupplementary)

Figure S1. FOS and EGR1 expression in human OCs from public database. The expression of (A) FOS and EGR1 genes were analyzed in ovarian carcinoma in TNMplot database comparing normal (n=113) and tumor tissues (n=374) (FOS  $P=1.52e-11$ , EGR1  $P=3.07e-07$  by Mann Whitney U test). (B) The same analysis was performed in GEPIA (TCGA normal vs GTEx data) dataset comparing normal (n=88) and tumor tissues (n=426) (llogFCI 0.58; \* $P<0.05$ ). FOS, proto-oncogene, AP-1 transcription factor subunit; EGR1, early growth response 1; OC, ovarian cancer; GEPIA, Gene Expression Profiling Interactive Analysis.

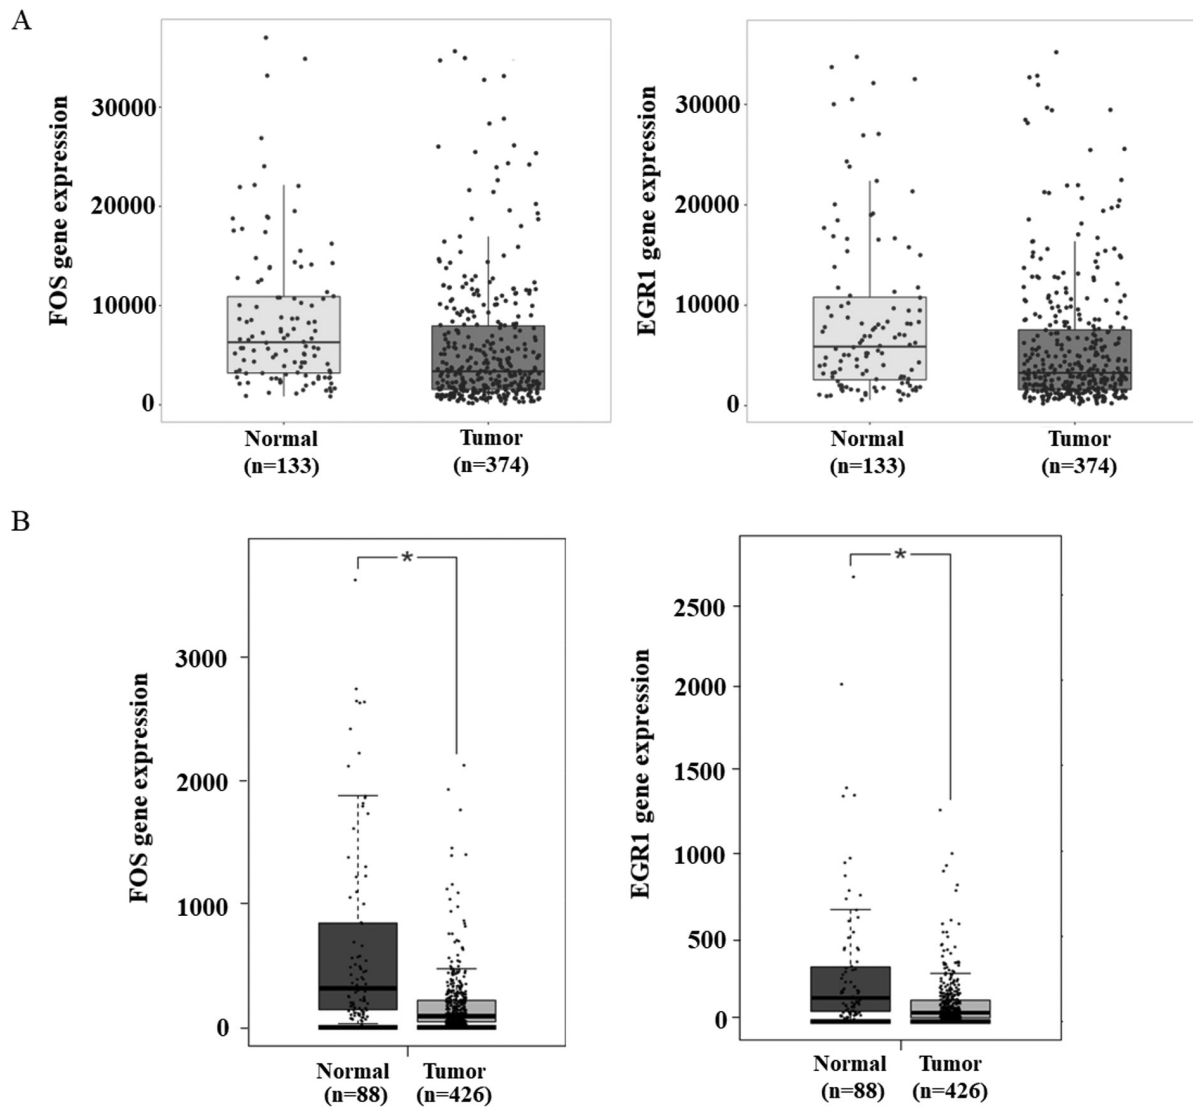

Supplement: Supplementary file 1 [file downloadSupplementary]
